# Supplementary material for: Towards improving the robustness of electrochemical gas sensors: impact of PMMA addition on the sensing of oxygen in an ionic liquid
Source: Royal Society of Chemistry journal article supplement (doi:10.1039/c5ay00497g), 2015-01-01
Supplement: c5ay00497g1.pdf [file c5ay00497g1.pdf]

# Supporting Information for:

## “Towards improving the robustness of electrochemical gas sensors: Assessment of PMMA addition on the sensing of oxygen in an ionic liquid”

Authors: Junqiao Lee, Gert Du Plessis, Damien W.M. Arrigan and Debbie S. Silvester

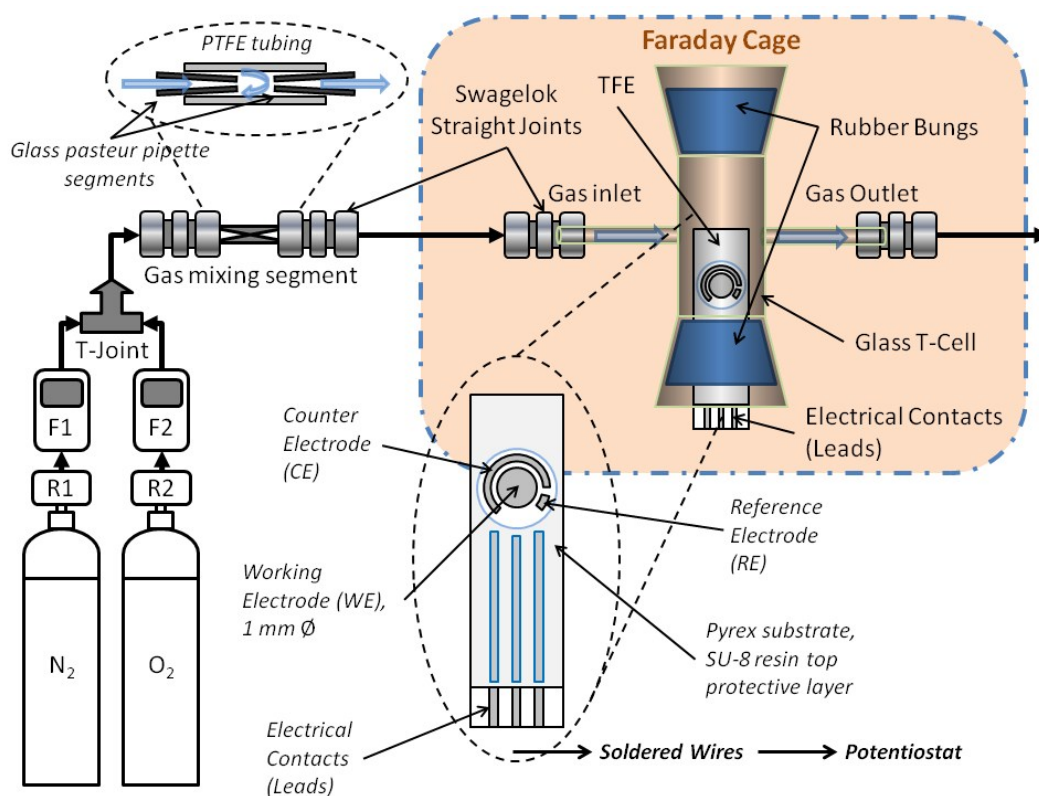

**Fig. S1.** Schematic of the gas mixing system and glass cell used for voltammetric measurements on thin-film electrodes (TFE) (where F1 and F2 are digital flow meters/controllers, and R1 and R2 are the pressure regulators). The glass cell is situated within an aluminium Faraday cage.

**Table S1.** Masses of PMMA,  $m_{\text{PMMA}}$ , and  $[\text{C}_2\text{mim}][\text{NTf}_2]$ ,  $m_{\text{RTIL}}$ , used to make up samples with total mass,  $m_{\text{Tot.}}$ , of 1.53 g for each mixture of PMMA-RTIL electrolyte sample. Based on the estimated total volumes,  $V_{\text{Tot.}}$ , of each mixture sample (assuming that the effective densities of each species remains unchanged after mixing), small volumes of acetone (as shown below) were added to the 30, 40, and 50 %  $m_{\text{PMMA}}/m_{\text{Tot.}}$  samples to reduce their viscosity so as to allow them be transferred via a micropipette onto the electrode surface. The volumes of the aliquots used were thus modified accordingly for those PMMA-RTIL mixtures so that the same volume of aliquot was present on the electrode surface.

| $m_{\text{PMMA}} / \text{g}$ | $V_{\text{RTIL}} / \text{mL}$<br>( $\pm 0.001 \text{ mL}$ ) | $m_{\text{RTIL}} / \text{g}$ | $V_{\text{Acetone}} / \mu\text{L}$ (to<br>reduce<br>viscosity) | PMMA doping mass<br>concentration,<br>$\%(m_{\text{PMMA}}/m_{\text{Tot.}}) / \% \text{ w/v}$ |
|------------------------------|-------------------------------------------------------------|------------------------------|----------------------------------------------------------------|----------------------------------------------------------------------------------------------|
| 0                            | 1.000                                                       | $1.530 \pm 0.002$            | 0                                                              | $0.0 \pm 0.1$                                                                                |
| $0.1533 \pm 0.0002$          | 0.900                                                       | $1.377 \pm 0.002$            | 0                                                              | $10.0 \pm 0.3$                                                                               |
| $0.3061 \pm 0.0001$          | 0.800                                                       | $1.224 \pm 0.002$            | 0                                                              | $20.0 \pm 0.1$                                                                               |
| $0.4591 \pm 0.0002$          | 0.700                                                       | $1.071 \pm 0.002$            | 54<br>(5 % of $V_{\text{Tot.}}$ )                              | $30.0 \pm 0.2$                                                                               |
| $0.6183 \pm 0.0002$          | 0.606                                                       | $0.927 \pm 0.002$            | 113<br>(10 % of $V_{\text{Tot.}}$ )                            | $40.0 \pm 0.2$                                                                               |
| $0.7652 \pm 0.0003$          | 0.500                                                       | $0.765 \pm 0.002$            | 230<br>(20 % of $V_{\text{Tot.}}$ )                            | $50.0 \pm 0.2$                                                                               |

*Density of  $[\text{C}_2\text{mim}][\text{NTf}_2]$  is  $1.53 \text{ g}\cdot\text{mL}^{-1}$  and density of PMMA is  $1.18 \text{ g}\cdot\text{mL}^{-1}$  (from supplier).*

**Table S2.** Contact angles,  $\theta$ , measured for each PMMA concentration. Error bars correspond to one standard deviation over the number of experimental measurements performed ( $n$ ).

| [PMMA]<br>/ %<br>$m_{\text{PMMA}}/m_{\text{Tot.}}$ | $\theta / \text{degrees}$ | $\cos(\theta_{\text{rad}})$ | $n$ |
|----------------------------------------------------|---------------------------|-----------------------------|-----|
| 0                                                  | $30 \pm 2$                | $0.87 \pm 0.06$             | 38  |
| 10                                                 | $27 \pm 2$                | $0.89 \pm 0.07$             | 42  |
| 20                                                 | $36 \pm 2$                | $0.81 \pm 0.04$             | 24  |
| 30                                                 | $48 \pm 6$                | $0.67 \pm 0.09$             | 54  |
| 40                                                 | $58 \pm 7$                | $0.53 \pm 0.07$             | 20  |
| 50                                                 | $74 \pm 5$                | $0.28 \pm 0.02$             | 10  |

### **Experimental: Contact angle measurements**

Contact angles of PMMA-[C<sub>2</sub>mim][NTf<sub>2</sub>] mixtures on glass substrates (glass slides – pathology grade, PLAIN 7101-BP, Livingstone, NSW, Australia), were measured using a goniometer (KVS Instruments LTD, Model: CAM 101, Helsinki, Finland). The glass slides were cleaned in aqua regia (hydrochloric acid 32% and nitric acid 70%, from Ajax Finechem Pty Ltd, WA, Australia) before sonicating in Milli-Q grade water for 15 mins, rinsing with acetone, and drying under N<sub>2</sub>. They were then subjected to UV-ozone cleaning (~50 W, BIOFORCE Nanosciences, Inc., Model: UV.TC.220 USA) for 10 minutes. The slides were rinsed with acetone, then isopropyl alcohol (meets USP testing specifications, Sigma-Aldrich Pty Ltd., NSW, Australia) and dried under N<sub>2</sub>. Approximately 30 % vol. of acetone was added to the 50 %  $m_{\text{PMMA}}/m_{\text{Tot}}$  sample. 6  $\mu\text{L}$  of the PMMA-RTIL samples were transferred onto the glass slides via a micropipette. The goniometer and sample were then enclosed in Perspex to reduce ambient sound-vibrations, drift in temperature, pressure, and humidity, and the deposited droplets were allowed to settle for 3 minutes before the contact angles were measured. Due to the significant viscosity of the PMMA/RTIL mixture at 40 and 50 %  $m_{\text{PMMA}}/m_{\text{Tot}}$ , aliquots of acetone have to be added (10 and 20 % vol. respectively) to enable the deposition of the highly viscous PMMA-RTIL mixture with a micropipette.

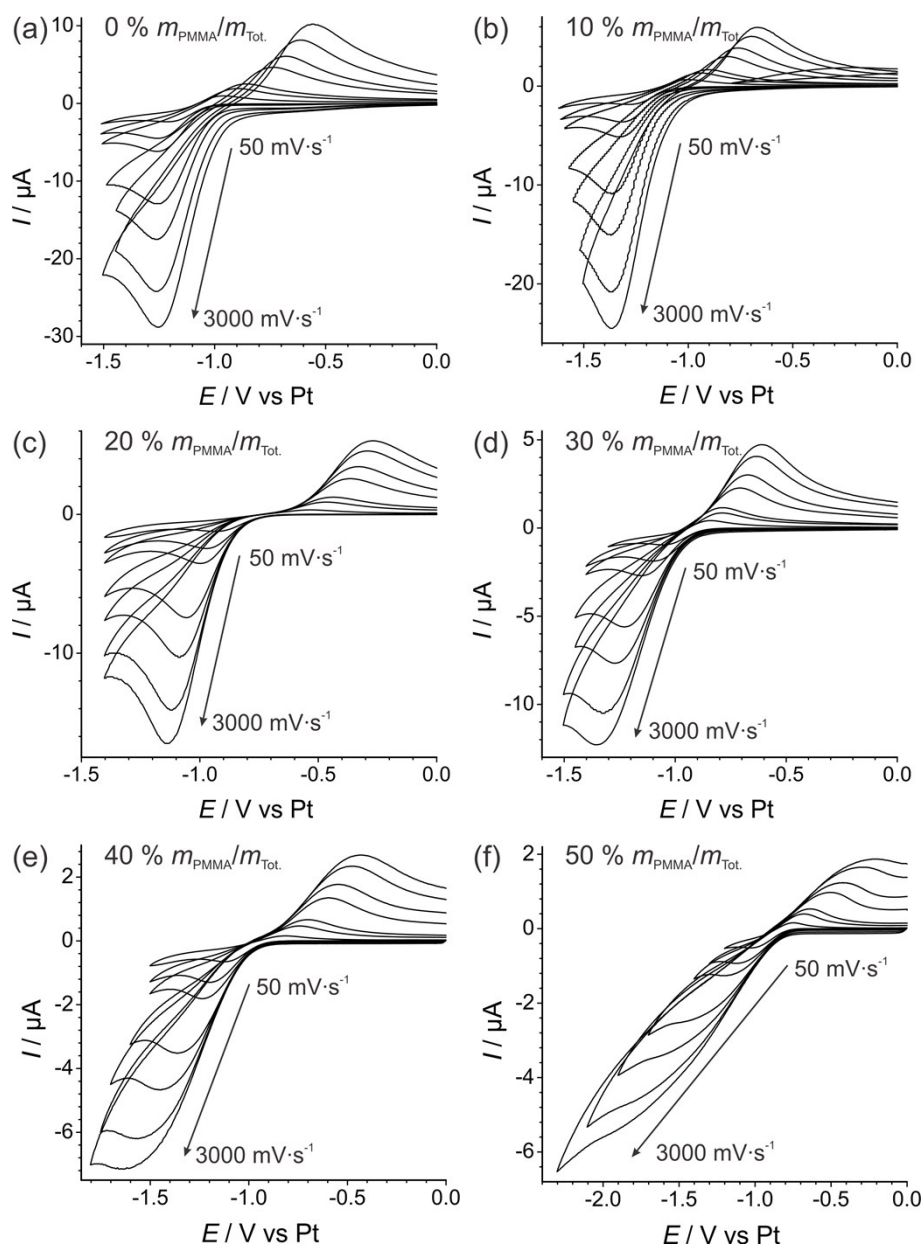

**Fig. S2.** Cyclic voltammetry of the  $\text{O}_2/\text{O}_2^{\bullet-}$  redox couple at varying scan rates vs. inbuilt Ag pseudo-RE, for different PMMA doping concentrations in  $[\text{C}_2\text{mim}][\text{NTf}_2]$  measured at 100 % vol.  $\text{O}_2$  flow (flow rate of 500 sccm).

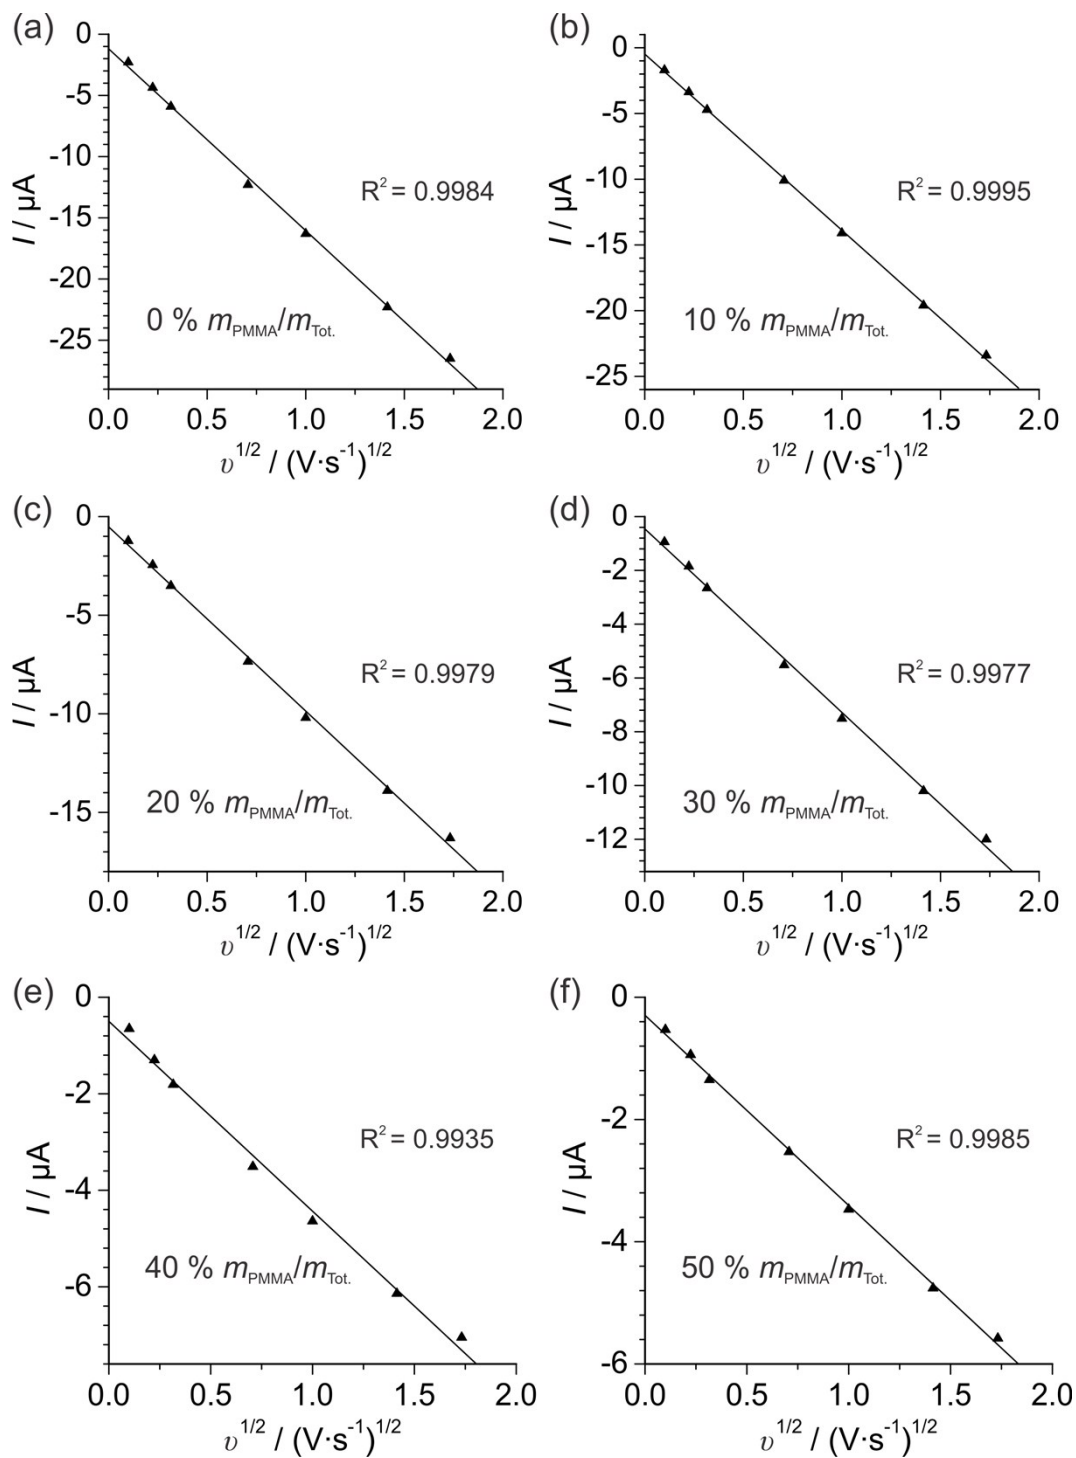

**Fig. S3.** Plots of peak current,  $I$ , vs. scan rates,  $v^{1/2}$  for the cyclic voltammetry presented in Fig. S2, the lines of linear regression fit, and the corresponding  $R^2$  values of the fittings, for each concentration of PMMA doping.

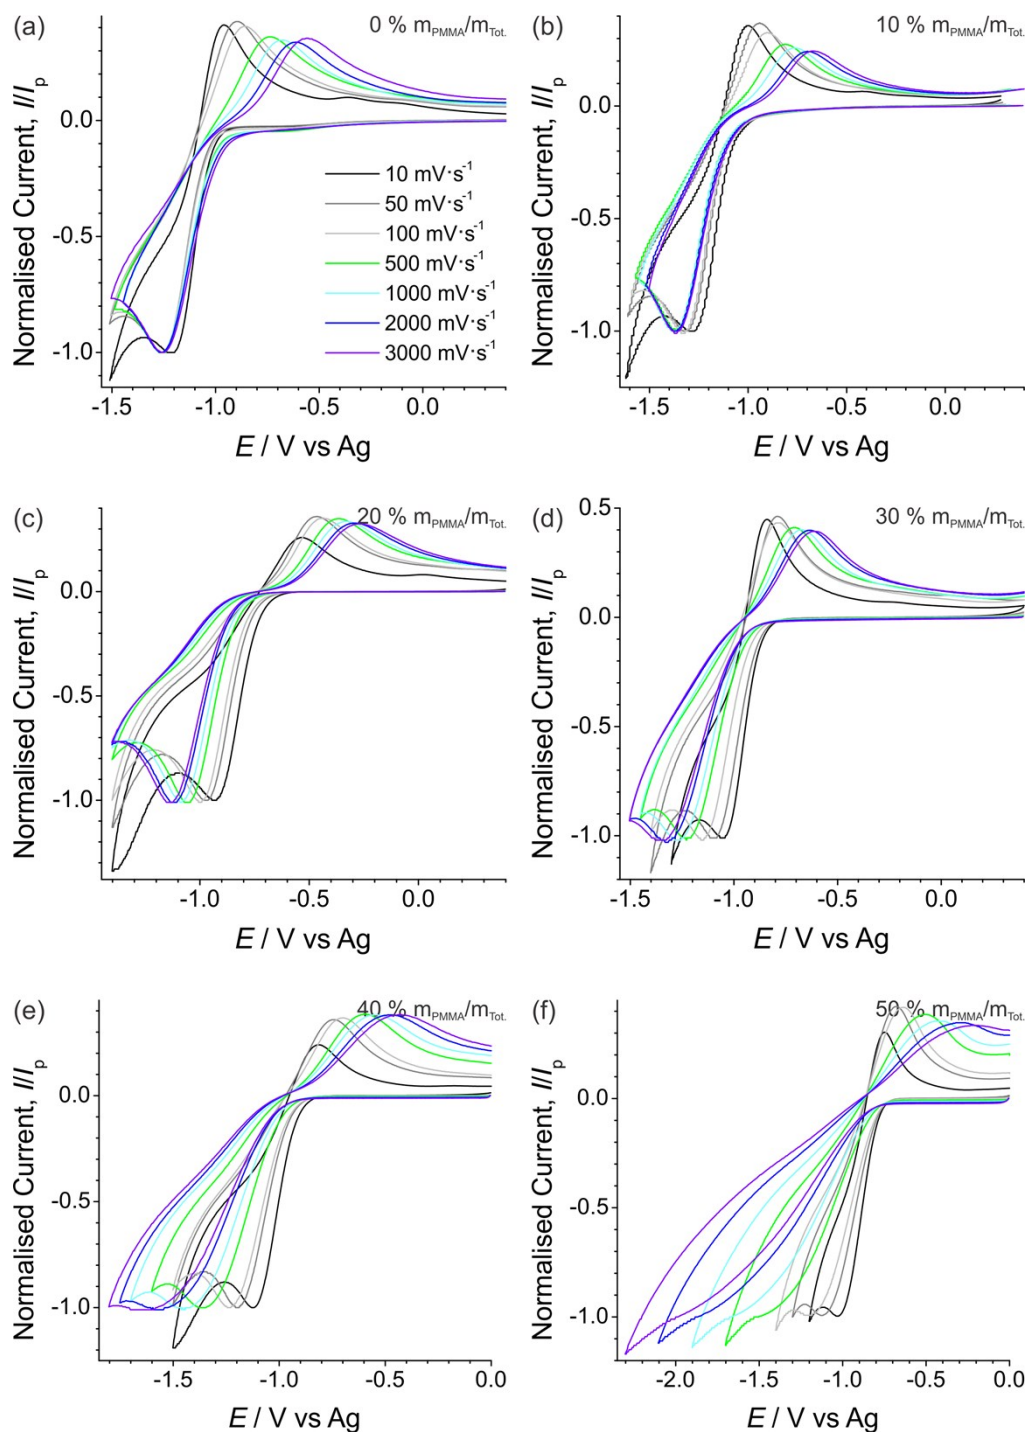

**Fig. S4.** Voltammograms as presented in Fig. S2., but with the oxygen reduction peak currents all normalized to unity to allow for a qualitative comparison of the stability of the electrogenerated superoxide. The results are presented at different PMMA doping concentrations in  $[\text{C}_2\text{mim}][\text{NTf}_2]$ , measured at 100 % vol.  $\text{O}_2$  flow (flow rate of 500 sccm).

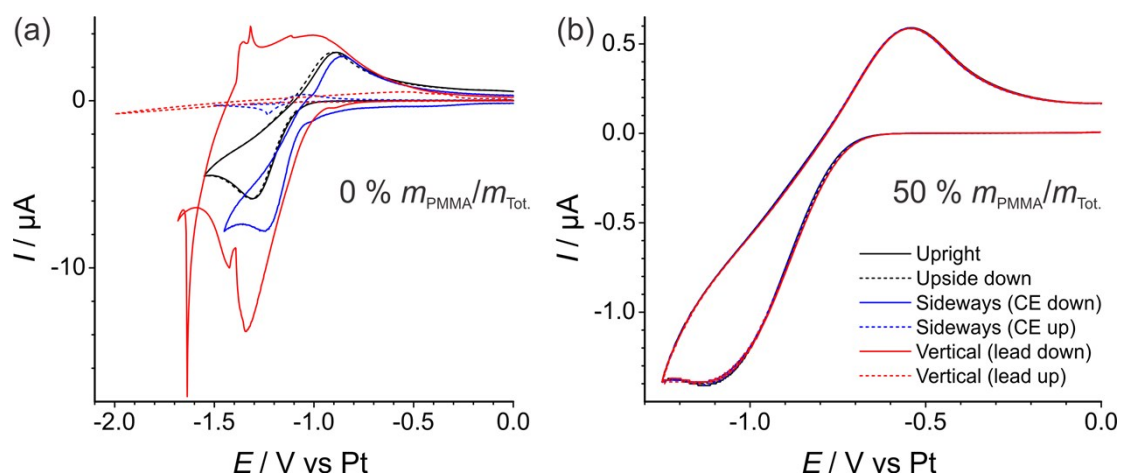

**Fig. S5.** Overlaid cyclic voltammograms for the  $O_2/O_2^{\bullet-}$  redox couple using a PMMA doping concentration of: **(a)** 0 % and **(b)** 50 %  $m_{PMMA}/m_{Tot.}$  in  $[C_2mim][NTf_2]$ , for Pt thin-film electrodes positioned in different orientations (i.e. upright, upside down, sideways (CE down), sideways (RE down), vertical (lead down), vertical (lead up)). Scans were measured at 100 % vol.  $O_2$  flow (500 sccm flow rate) at a scan rate of  $100 \text{ mV} \cdot \text{s}^{-1}$ . The thin-film Pt-electrodes were held at the respective orientations for at least 30 mins before measurements were commenced. The 50 %  $m_{PMMA}/m_{Tot.}$  results show no change in response for all orientations.

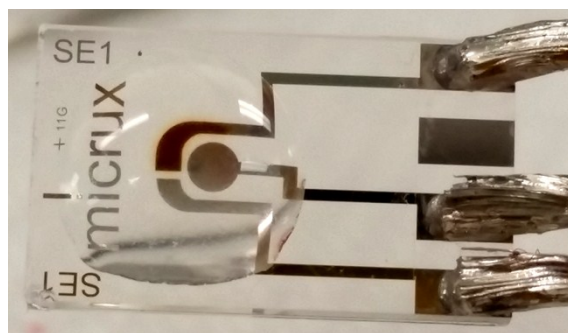

**Fig. S6.** Photo taken of a Pt TFE with 30 %  $m_{PMMA}/m_{Tot.}$  PMMA- $[C_2mim][NTf_2]$  electrolyte after long-term scanning in the presence of 100 % vol.  $O_2$  flow. Sign of accumulation of counter electrode reaction product on the CE and WE is clearly visible.

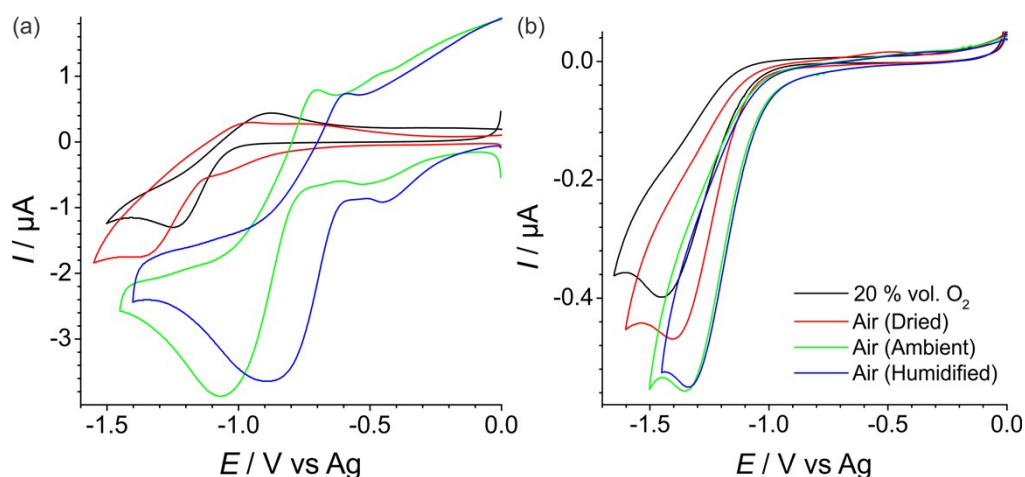

**Fig. S7.** Cyclic voltammetry for oxygen reduction in different environments: 20 % vol. O<sub>2</sub> in nitrogen, dried air that has been passed through regular building air scrubber/filtration system (i.e. no specific lab-based preparation of the air was employed), ambient air, and humidified air (by bubbling air vigorously through a container of water), in **(a)** neat [C<sub>2</sub>mim][NTf<sub>2</sub>] and **(b)** in 50 %  $m_{\text{PMMA}}/m_{\text{Tot}}$ .

**Table S3.** Values of the oxygen reduction peak potentials,  $E_p$ , and currents,  $I_p$ , extracted from the CVs presented in Fig S7 for experiments conducted in different environments (20 % O<sub>2</sub> in nitrogen, dried air, ambient air, and humidified air).

| Atmosphere               | Neat [C <sub>2</sub> mim][NTf <sub>2</sub> ] |            | 50 % $m_{\text{PMMA}}/m_{\text{Tot}}$<br>PMMA in [C <sub>2</sub> mim][NTf <sub>2</sub> ] |            |
|--------------------------|----------------------------------------------|------------|------------------------------------------------------------------------------------------|------------|
|                          | $E_p$ / V vs Ag                              | $I_p$ / μA | $E_p$ / V vs Ag                                                                          | $I_p$ / μA |
| 20 % vol. O <sub>2</sub> | -1.25                                        | -1.30      | -1.45                                                                                    | -0.398     |
| Air (Dried)              | -1.55                                        | -1.84      | -1.41                                                                                    | -0.469     |
| Air (Ambient)            | -1.07                                        | -3.87      | -1.35                                                                                    | -0.557     |
| Air (Humidified)         | -0.89                                        | -3.64      | -1.34                                                                                    | -0.550     |
